# Supplementary material
Source: PubMed Central journal article supplement (PMC193630)

# Supplementary Figure 2

## A

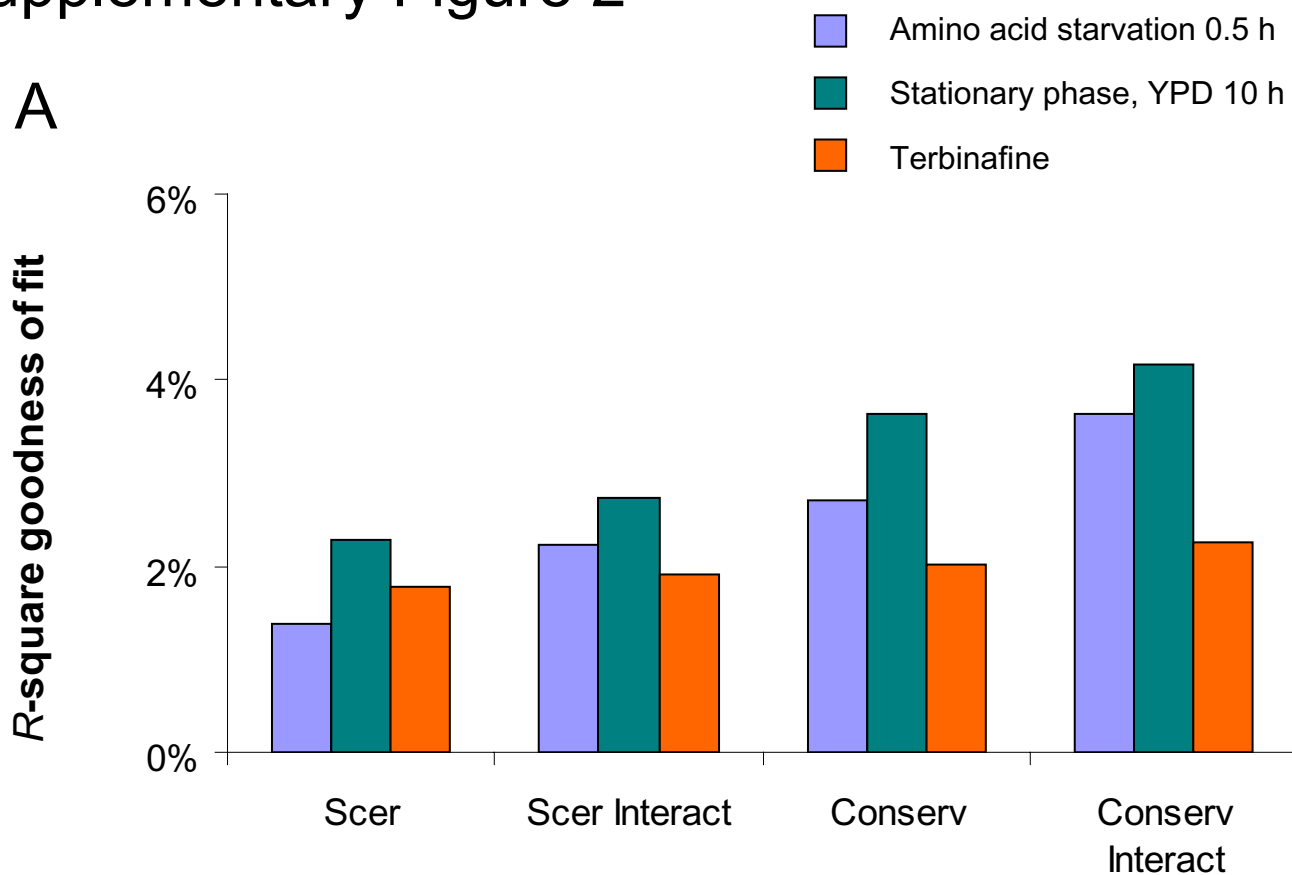

## B

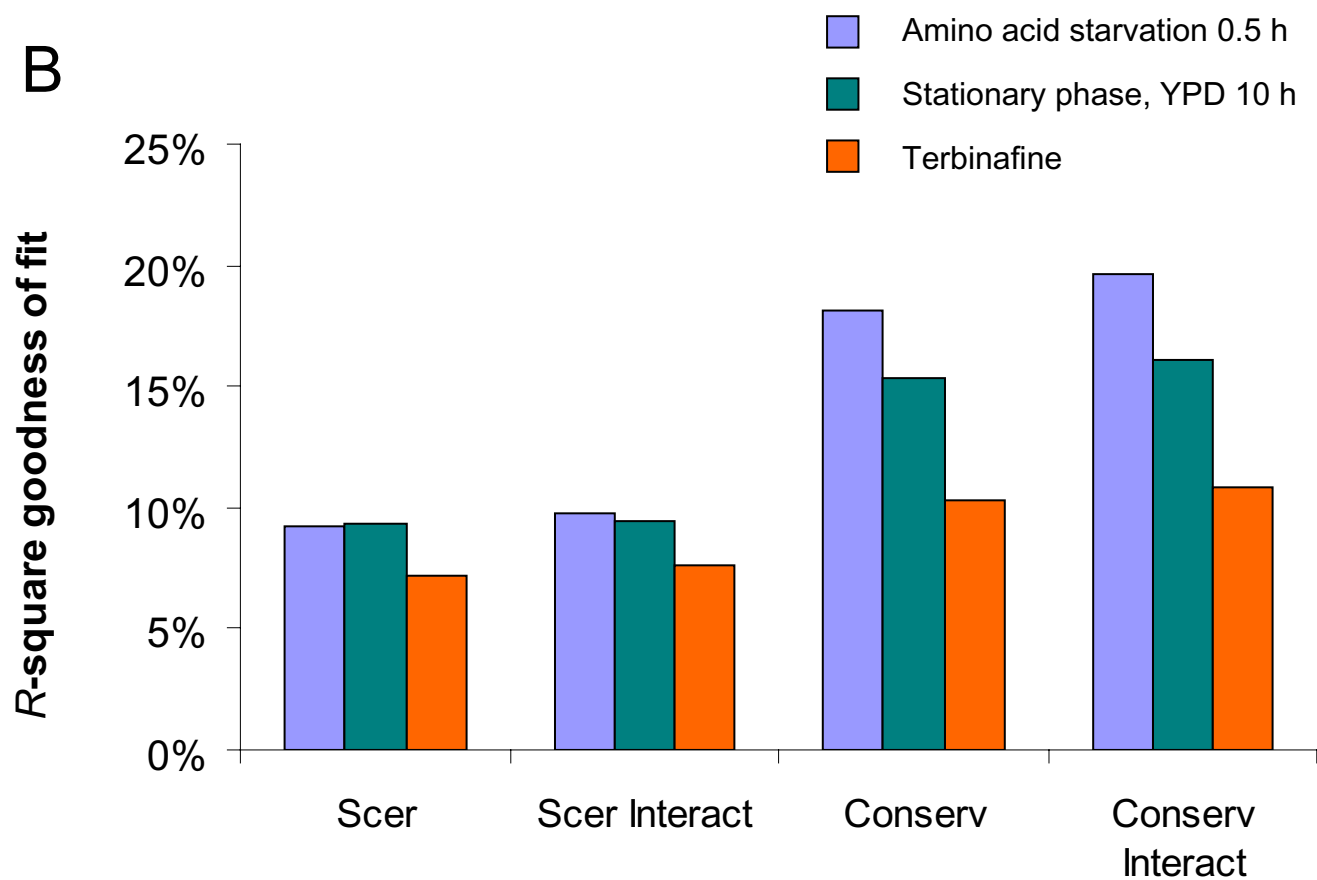

Supplement: gb-2003-4-7-r43-s3.pdf [file gb-2003-4-7-r43-s3.pdf]
